# Supplementary material for: riboCIRC: a comprehensive database of translatable circRNAs
Source: PubMed Central journal article supplement (PMC7938571; doi:10.1186/s13059-021-02300-7), 2021-03-08
Supplement: 13059_2021_2300_MOESM2_ESM.pdf [file 13059_2021_2300_MOESM2_ESM.pdf]

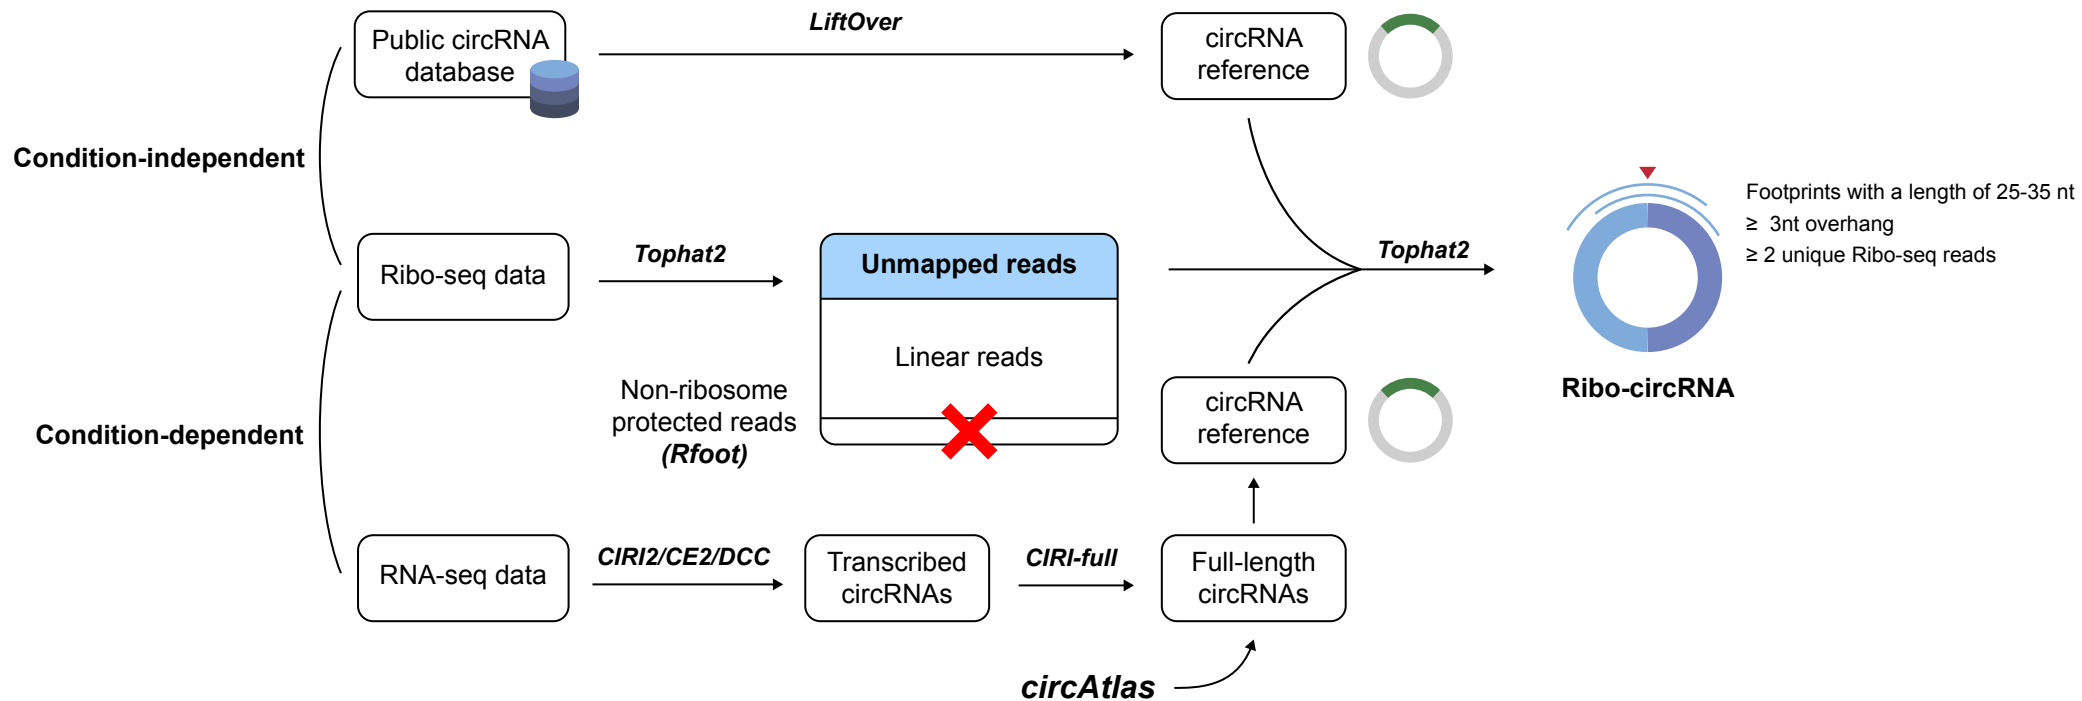

**Figure S1.** Flow diagram of processing pipeline for translatable circRNAs. Two different strategies were used to characterize ribosome-associated circRNAs: condition-dependent detection for Ribo-seq and perfectly matched RNA-seq datasets and condition-independent detection for previously reported circRNAs and Ribo-seq datasets.
